# Supplementary material
Source: MDPI journal article supplement (https://www.mdpi.com/2227-9717/12/2/332)
Supplement: s1 [file s1]

**Supplementary Tables**  
**CrossTx: Cross-cell line Transcriptomic Signature Predictions**

Panagiotis Chrysinas<sup>1</sup>, Changyou Chen<sup>2</sup>, Rudiyanto Gunawan<sup>1,\*</sup>

<sup>1</sup>Department of Chemical and Biological Engineering, University at Buffalo-SUNY, Buffalo, NY 14260, USA

<sup>2</sup>Department of Computer Science and Engineering, University at Buffalo-SUNY, Buffalo, NY 14260, USA

**Supplementary Table S1. Pearson correlations of drug signature predictions by CrossTx and TT-WOPT for individual cell lines.** Values correspond to mean  $\pm$  standard deviation. Bold values signify the best method based on Pearson correlation. Statistical significance was established by two-sided paired t-test to assessed the change in accuracy by adding a Corrector. For example, Mean + PCA was compared to Mean, while Mean + PCA + AE was compared to Mean + PCA. Note that the addition of a Corrector may degrade accuracy. TT-WOPT was compared to the Mean method. \*:  $p$ -values < 0.05.

| Cell type \ Method                                                                 | MCF7                                         | A375                                         | HT29                                         | PC3                                          | HA1E                                         | YAPC                                         | HELA                                         |
|------------------------------------------------------------------------------------|----------------------------------------------|----------------------------------------------|----------------------------------------------|----------------------------------------------|----------------------------------------------|----------------------------------------------|----------------------------------------------|
| <b>Predictor: Mean (<math>\mu</math>) + Corrector: PCA, AE, PCA + AE, AE + PCA</b> |                                              |                                              |                                              |                                              |                                              |                                              |                                              |
| Mean                                                                               | 0.59<br>$\pm 0.14$                           | 0.58<br>$\pm 0.12$                           | 0.6<br>$\pm 0.13$                            | 0.59<br>$\pm 0.14$                           | 0.58<br>$\pm 0.14$                           | 0.58<br>$\pm 0.18$                           | 0.62<br>$\pm 0.11$                           |
| Mean + PCA                                                                         | 0.76*<br>$\pm 0.17$                          | 0.77*<br>$\pm 0.15$                          | 0.77*<br>$\pm 0.18$                          | 0.75*<br>$\pm 0.19$                          | 0.74*<br>$\pm 0.21$                          | 0.72*<br>$\pm 0.23$                          | 0.76*<br>$\pm 0.2$                           |
| Mean + AE                                                                          | 0.72*<br>$\pm 0.15$                          | 0.67*<br>$\pm 0.15$                          | 0.73*<br>$\pm 0.14$                          | 0.71*<br>$\pm 0.16$                          | 0.67*<br>$\pm 0.16$                          | 0.69*<br>$\pm 0.22$                          | 0.76*<br>$\pm 0.12$                          |
| Mean + PCA + AE                                                                    | <b>0.78*</b><br><b><math>\pm 0.17</math></b> | <b>0.78*</b><br><b><math>\pm 0.16</math></b> | <b>0.78*</b><br><b><math>\pm 0.18</math></b> | <b>0.77*</b><br><b><math>\pm 0.19</math></b> | <b>0.75*</b><br><b><math>\pm 0.22</math></b> | <b>0.74*</b><br><b><math>\pm 0.24</math></b> | <b>0.79*</b><br><b><math>\pm 0.19</math></b> |
| Mean + AE + PCA                                                                    | 0.75*<br>$\pm 0.18$                          | 0.76*<br>$\pm 0.16$                          | 0.76*<br>$\pm 0.18$                          | 0.73*<br>$\pm 0.21$                          | 0.73*<br>$\pm 0.22$                          | 0.69<br>$\pm 0.25$                           | 0.76<br>$\pm 0.2$                            |
| <b>Predictor: Regression + Corrector: PCA, AE, PCA + AE, AE + PCA</b>              |                                              |                                              |                                              |                                              |                                              |                                              |                                              |
| Regression                                                                         | 0.55<br>$\pm 0.15$                           | 0.56<br>$\pm 0.14$                           | 0.56<br>$\pm 0.17$                           | 0.56<br>$\pm 0.16$                           | 0.54<br>$\pm 0.16$                           | 0.52<br>$\pm 0.22$                           | 0.54<br>$\pm 0.16$                           |
| Regression + PCA                                                                   | 0.62*<br>$\pm 0.25$                          | 0.69*<br>$\pm 0.22$                          | 0.66*<br>$\pm 0.25$                          | 0.61*<br>$\pm 0.26$                          | 0.6*<br>$\pm 0.27$                           | 0.62*<br>$\pm 0.27$                          | 0.63*<br>$\pm 0.27$                          |
| Regression + AE                                                                    | 0.46*<br>$\pm 0.26$                          | 0.25*<br>$\pm 0.38$                          | 0.44*<br>$\pm 0.3$                           | 0.35*<br>$\pm 0.34$                          | 0.23*<br>$\pm 0.41$                          | 0.38*<br>$\pm 0.31$                          | 0.49*<br>$\pm 0.29$                          |
| Regression + PCA + AE                                                              | <b>0.66*</b><br><b><math>\pm 0.24</math></b> | <b>0.72*</b><br><b><math>\pm 0.22</math></b> | <b>0.68*</b><br><b><math>\pm 0.26</math></b> | <b>0.63*</b><br><b><math>\pm 0.26</math></b> | <b>0.61*</b><br><b><math>\pm 0.29</math></b> | <b>0.66*</b><br><b><math>\pm 0.26</math></b> | <b>0.66*</b><br><b><math>\pm 0.26</math></b> |
| Regression + AE + PCA                                                              | 0.45<br>$\pm 0.3$                            | 0.28*<br>$\pm 0.47$                          | 0.55*<br>$\pm 0.31$                          | 0.39*<br>$\pm 0.35$                          | 0.23<br>$\pm 0.46$                           | 0.47*<br>$\pm 0.29$                          | 0.47<br>$\pm 0.31$                           |
| <b>TT-WOPT</b>                                                                     |                                              |                                              |                                              |                                              |                                              |                                              |                                              |
| TT-WOPT                                                                            | 0.31*<br>$\pm 0.16$                          | 0.19*<br>$\pm 0.2$                           | 0.18*<br>$\pm 0.18$                          | 0.05*<br>$\pm 0.12$                          | 0.36*<br>$\pm 0.15$                          | 0.18*<br>$\pm 0.15$                          | 0.24*<br>$\pm 0.2$                           |

**Supplementary Table S2. AUPRs of drug signature predictions by CrossTx using the Mean method as Predictor and TT-WOPT for individual cell lines.** Values correspond to mean  $\pm$  standard deviation. Bold values signify the best method based on Pearson correlation. Statistical significance was established by two-sided paired t-test to assessed the change in accuracy by adding a Corrector. For example, Mean + PCA was compared to Mean, while Mean + PCA + AE was compared to Mean + PCA. Note that the addition of a Corrector may degrade accuracy. TT-WOPT was compared to the Mean method. \*:  $p$ -values < 0.05.

| Cell type<br>Method                            | MCF7                                         | A375                                         | HT29                                         | PC3                                          | HA1E                                         | YAPC                                         | HELA                                         |
|------------------------------------------------|----------------------------------------------|----------------------------------------------|----------------------------------------------|----------------------------------------------|----------------------------------------------|----------------------------------------------|----------------------------------------------|
| <b>AUPR for predicting upregulated genes</b>   |                                              |                                              |                                              |                                              |                                              |                                              |                                              |
| Mean                                           | 0.66<br>$\pm 0.11$                           | 0.65<br>$\pm 0.1$                            | 0.66<br>$\pm 0.11$                           | 0.65<br>$\pm 0.12$                           | 0.65<br>$\pm 0.12$                           | 0.65<br>$\pm 0.14$                           | 0.68<br>$\pm 0.11$                           |
| Mean + PCA                                     | 0.78*<br>$\pm 0.14$                          | 0.79*<br>$\pm 0.13$                          | 0.79*<br>$\pm 0.15$                          | 0.77*<br>$\pm 0.15$                          | 0.77*<br>$\pm 0.17$                          | 0.75*<br>$\pm 0.17$                          | 0.79*<br>$\pm 0.16$                          |
| Mean + AE                                      | 0.75*<br>$\pm 0.13$                          | 0.73*<br>$\pm 0.13$                          | 0.76*<br>$\pm 0.14$                          | 0.74*<br>$\pm 0.14$                          | 0.72*<br>$\pm 0.14$                          | 0.73*<br>$\pm 0.17$                          | 0.78*<br>$\pm 0.12$                          |
| Mean + PCA + AE                                | <b>0.79*</b><br><b><math>\pm 0.14</math></b> | <b>0.80*</b><br><b><math>\pm 0.13</math></b> | <b>0.80*</b><br><b><math>\pm 0.15</math></b> | <b>0.79*</b><br><b><math>\pm 0.16</math></b> | <b>0.78*</b><br><b><math>\pm 0.17</math></b> | <b>0.78*</b><br><b><math>\pm 0.17</math></b> | <b>0.81*</b><br><b><math>\pm 0.15</math></b> |
| Mean + AE + PCA                                | 0.77*<br>$\pm 0.14$                          | 0.78*<br>$\pm 0.13$                          | 0.78*<br>$\pm 0.15$                          | 0.76*<br>$\pm 0.17$                          | 0.76*<br>$\pm 0.17$                          | 0.74<br>$\pm 0.18$                           | 0.79<br>$\pm 0.15$                           |
| TT-WOPT                                        | 0.48*<br>$\pm 0.1$                           | 0.431*<br>$\pm 0.095$                        | 0.428*<br>$\pm 0.095$                        | 0.347*<br>$\pm 0.087$                        | 0.52*<br>$\pm 0.12$                          | 0.405*<br>$\pm 0.097$                        | 0.44*<br>$\pm 0.13$                          |
| <b>AUPR for predicting downregulated genes</b> |                                              |                                              |                                              |                                              |                                              |                                              |                                              |
| Mean                                           | 0.65<br>$\pm 0.11$                           | 0.67<br>$\pm 0.11$                           | 0.67<br>$\pm 0.11$                           | 0.65<br>$\pm 0.13$                           | 0.66<br>$\pm 0.13$                           | 0.68<br>$\pm 0.12$                           | 0.686<br>$\pm 0.096$                         |
| Mean + PCA                                     | 0.79*<br>$\pm 0.14$                          | 0.82*<br>$\pm 0.13$                          | 0.81*<br>$\pm 0.14$                          | 0.78*<br>$\pm 0.16$                          | 0.79*<br>$\pm 0.17$                          | 0.79*<br>$\pm 0.15$                          | 0.81*<br>$\pm 0.15$                          |
| Mean + AE                                      | 0.76*<br>$\pm 0.12$                          | 0.74*<br>$\pm 0.13$                          | 0.78*<br>$\pm 0.13$                          | 0.74*<br>$\pm 0.15$                          | 0.72*<br>$\pm 0.14$                          | 0.76*<br>$\pm 0.15$                          | 0.80*<br>$\pm 0.1$                           |
| Mean + PCA + AE                                | <b>0.81*</b><br><b><math>\pm 0.14</math></b> | <b>0.83*</b><br><b><math>\pm 0.13</math></b> | <b>0.82*</b><br><b><math>\pm 0.14</math></b> | <b>0.80*</b><br><b><math>\pm 0.16</math></b> | <b>0.80*</b><br><b><math>\pm 0.17</math></b> | <b>0.81*</b><br><b><math>\pm 0.16</math></b> | <b>0.83*</b><br><b><math>\pm 0.14</math></b> |
| Mean + AE + PCA                                | 0.79*<br>$\pm 0.15$                          | 0.80*<br>$\pm 0.13$                          | 0.81*<br>$\pm 0.14$                          | 0.77*<br>$\pm 0.17$                          | 0.78*<br>$\pm 0.17$                          | 0.77<br>$\pm 0.16$                           | 0.80<br>$\pm 0.15$                           |
| TT-WOPT                                        | 0.50*<br>$\pm 0.11$                          | 0.46*<br>$\pm 0.12$                          | 0.43*<br>$\pm 0.11$                          | 0.365*<br>$\pm 0.097$                        | 0.53*<br>$\pm 0.14$                          | 0.448*<br>$\pm 0.087$                        | 0.48*<br>$\pm 0.12$                          |

**Supplementary Table S3. AUPRs of drug signature predictions by CrossTx using the Regression method as Predictor and TT-WOPT for individual cell lines.** Values correspond to mean  $\pm$  standard deviation. Bold values signify the best method based on Pearson correlation. Statistical significance was established by two-sided paired t-test to assessed the change in accuracy by adding a Corrector. For example, Mean + PCA was compared to Mean, while Mean + PCA + AE was compared to Mean + PCA. Note that the addition of a Corrector may degrade accuracy. TT-WOPT was compared to the Regression method. \*:  $p$ -values < 0.05.

| Cell type \ Method                             | MCF7                                         | A375                                         | HT29                                         | PC3                                         | HA1E                                        | YAPC                                         | HELA                                         |
|------------------------------------------------|----------------------------------------------|----------------------------------------------|----------------------------------------------|---------------------------------------------|---------------------------------------------|----------------------------------------------|----------------------------------------------|
| <b>AUPR for predicting upregulated genes</b>   |                                              |                                              |                                              |                                             |                                             |                                              |                                              |
| Regression                                     | 0.64<br>$\pm 0.12$                           | 0.64<br>$\pm 0.11$                           | 0.63<br>$\pm 0.13$                           | 0.63<br>$\pm 0.13$                          | 0.62<br>$\pm 0.14$                          | 0.61<br>$\pm 0.15$                           | 0.63<br>$\pm 0.13$                           |
| Regression + PCA                               | 0.67*<br>$\pm 0.18$                          | 0.74*<br>$\pm 0.16$                          | 0.71*<br>$\pm 0.19$                          | 0.66*<br>$\pm 0.2$                          | 0.66*<br>$\pm 0.19$                         | 0.68*<br>$\pm 0.2$                           | 0.69*<br>$\pm 0.19$                          |
| Regression + AE                                | 0.58*<br>$\pm 0.18$                          | 0.51*<br>$\pm 0.21$                          | 0.58*<br>$\pm 0.2$                           | 0.52*<br>$\pm 0.22$                         | 0.49*<br>$\pm 0.22$                         | 0.55*<br>$\pm 0.2$                           | 0.60*<br>$\pm 0.2$                           |
| Regression + PCA + AE                          | <b>0.71*</b><br><b><math>\pm 0.18</math></b> | <b>0.77*</b><br><b><math>\pm 0.17</math></b> | <b>0.73*</b><br><b><math>\pm 0.2</math></b>  | <b>0.69*</b><br><b><math>\pm 0.2</math></b> | <b>0.69*</b><br><b><math>\pm 0.2</math></b> | <b>0.71*</b><br><b><math>\pm 0.2</math></b>  | <b>0.72*</b><br><b><math>\pm 0.19</math></b> |
| Regression + AE + PCA                          | 0.58<br>$\pm 0.19$                           | 0.54*<br>$\pm 0.25$                          | 0.64*<br>$\pm 0.22$                          | 0.54*<br>$\pm 0.23$                         | 0.50*<br>$\pm 0.24$                         | 0.59*<br>$\pm 0.2$                           | 0.59<br>$\pm 0.22$                           |
| TT-WOPT                                        | 0.48*<br>$\pm 0.1$                           | 0.431*<br>$\pm 0.095$                        | 0.428*<br>$\pm 0.095$                        | 0.347*<br>$\pm 0.087$                       | 0.52*<br>$\pm 0.12$                         | 0.405*<br>$\pm 0.097$                        | 0.44*<br>$\pm 0.13$                          |
| <b>AUPR for predicting downregulated genes</b> |                                              |                                              |                                              |                                             |                                             |                                              |                                              |
| Regression                                     | 0.63<br>$\pm 0.12$                           | 0.67<br>$\pm 0.11$                           | 0.65<br>$\pm 0.12$                           | 0.64<br>$\pm 0.14$                          | 0.64<br>$\pm 0.14$                          | 0.65<br>$\pm 0.14$                           | 0.64<br>$\pm 0.12$                           |
| Regression + PCA                               | 0.69*<br>$\pm 0.19$                          | 0.76*<br>$\pm 0.16$                          | 0.73*<br>$\pm 0.18$                          | 0.68*<br>$\pm 0.2$                          | 0.69*<br>$\pm 0.19$                         | 0.72*<br>$\pm 0.19$                          | 0.71*<br>$\pm 0.19$                          |
| Regression + AE                                | 0.59*<br>$\pm 0.18$                          | 0.5*<br>$\pm 0.22$                           | 0.58*<br>$\pm 0.21$                          | 0.52*<br>$\pm 0.22$                         | 0.48*<br>$\pm 0.22$                         | 0.56*<br>$\pm 0.21$                          | 0.63*<br>$\pm 0.19$                          |
| Regression + PCA + AE                          | <b>0.73*</b><br><b><math>\pm 0.18</math></b> | <b>0.78*</b><br><b><math>\pm 0.16</math></b> | <b>0.76*</b><br><b><math>\pm 0.19</math></b> | <b>0.70*</b><br><b><math>\pm 0.2</math></b> | <b>0.71*</b><br><b><math>\pm 0.2</math></b> | <b>0.75*</b><br><b><math>\pm 0.18</math></b> | <b>0.74*</b><br><b><math>\pm 0.18</math></b> |
| Regression + AE + PCA                          | 0.58*<br>$\pm 0.21$                          | 0.53*<br>$\pm 0.26$                          | 0.66*<br>$\pm 0.22$                          | 0.55*<br>$\pm 0.23$                         | 0.49*<br>$\pm 0.26$                         | 0.61*<br>$\pm 0.2$                           | 0.63<br>$\pm 0.2$                            |
| TT-WOPT                                        | 0.50*<br>$\pm 0.11$                          | 0.46*<br>$\pm 0.12$                          | 0.43*<br>$\pm 0.11$                          | 0.365*<br>$\pm 0.097$                       | 0.53*<br>$\pm 0.14$                         | 0.448*<br>$\pm 0.087$                        | 0.48*<br>$\pm 0.12$                          |

**Supplementary Table S4. AUROCs of drug signature predictions by CrossTx using the Mean method as Predictor and TT-WOPT for individual cell lines.** Values correspond to mean  $\pm$  standard deviation. Bold values signify the best method based on Pearson correlation. Statistical significance was established by two-sided paired t-test to assessed the change in accuracy by adding a Corrector. For example, Mean + PCA was compared to Mean, while Mean + PCA + AE was compared to Mean + PCA. Note that the addition of a Corrector may degrade accuracy. TT-WOPT was compared to the Mean method. \*:  $p$ -values < 0.05.

| Cell type \ Method                              | MCF7                                           | A375                                           | HT29                                           | PC3                                            | HA1E                                         | YAPC                                         | HELA                                           |
|-------------------------------------------------|------------------------------------------------|------------------------------------------------|------------------------------------------------|------------------------------------------------|----------------------------------------------|----------------------------------------------|------------------------------------------------|
| <b>AUROC for predicting upregulated genes</b>   |                                                |                                                |                                                |                                                |                                              |                                              |                                                |
| Mean                                            | 0.782<br>$\pm 0.069$                           | 0.779<br>$\pm 0.064$                           | 0.787<br>$\pm 0.068$                           | 0.791<br>$\pm 0.067$                           | 0.785<br>$\pm 0.073$                         | 0.781<br>$\pm 0.092$                         | 0.799<br>$\pm 0.064$                           |
| Mean + PCA                                      | 0.87*<br>$\pm 0.085$                           | 0.878*<br>$\pm 0.079$                          | 0.874*<br>$\pm 0.096$                          | 0.869*<br>$\pm 0.096$                          | 0.86*<br>$\pm 0.11$                          | 0.85*<br>$\pm 0.12$                          | 0.87*<br>$\pm 0.1$                             |
| Mean + AE                                       | 0.854*<br>$\pm 0.078$                          | 0.835*<br>$\pm 0.082$                          | 0.858*<br>$\pm 0.08$                           | 0.854*<br>$\pm 0.08$                           | 0.835*<br>$\pm 0.085$                        | 0.84*<br>$\pm 0.12$                          | 0.877*<br>$\pm 0.069$                          |
| Mean + PCA + AE                                 | <b>0.88*</b><br><b><math>\pm 0.087</math></b>  | <b>0.886*</b><br><b><math>\pm 0.081</math></b> | <b>0.883*</b><br><b><math>\pm 0.098</math></b> | <b>0.881*</b><br><b><math>\pm 0.097</math></b> | <b>0.87*</b><br><b><math>\pm 0.11</math></b> | <b>0.86*</b><br><b><math>\pm 0.12</math></b> | <b>0.89*</b><br><b><math>\pm 0.1</math></b>    |
| Mean + AE + PCA                                 | 0.867*<br>$\pm 0.091$                          | 0.871*<br>$\pm 0.083$                          | 0.87*<br>$\pm 0.095$                           | 0.86<br>$\pm 0.11$                             | 0.86*<br>$\pm 0.11$                          | 0.84<br>$\pm 0.13$                           | 0.87<br>$\pm 0.1$                              |
| TT-WOPT                                         | 0.647*<br>$\pm 0.08$                           | 0.592*<br>$\pm 0.097$                          | 0.586*<br>$\pm 0.09$                           | 0.522*<br>$\pm 0.061$                          | 0.683*<br>$\pm 0.08$                         | 0.572*<br>$\pm 0.074$                        | 0.618*<br>$\pm 0.099$                          |
| <b>AUROC for predicting downregulated genes</b> |                                                |                                                |                                                |                                                |                                              |                                              |                                                |
| Mean                                            | 0.80<br>$\pm 0.07$                             | 0.788<br>$\pm 0.065$                           | 0.805<br>$\pm 0.065$                           | 0.798<br>$\pm 0.075$                           | 0.789<br>$\pm 0.07$                          | 0.793<br>$\pm 0.087$                         | 0.812<br>$\pm 0.055$                           |
| Mean + PCA                                      | 0.889*<br>$\pm 0.086$                          | 0.891*<br>$\pm 0.076$                          | 0.892*<br>$\pm 0.086$                          | 0.878*<br>$\pm 0.098$                          | 0.87*<br>$\pm 0.11$                          | 0.87*<br>$\pm 0.11$                          | 0.891*<br>$\pm 0.088$                          |
| Mean + AE                                       | 0.872*<br>$\pm 0.078$                          | 0.841*<br>$\pm 0.081$                          | 0.874*<br>$\pm 0.075$                          | 0.857*<br>$\pm 0.089$                          | 0.838*<br>$\pm 0.085$                        | 0.86*<br>$\pm 0.11$                          | 0.892*<br>$\pm 0.059$                          |
| Mean + PCA + AE                                 | <b>0.898*</b><br><b><math>\pm 0.086</math></b> | <b>0.897*</b><br><b><math>\pm 0.079</math></b> | <b>0.901*</b><br><b><math>\pm 0.088</math></b> | <b>0.89*</b><br><b><math>\pm 0.1</math></b>    | <b>0.88*</b><br><b><math>\pm 0.11</math></b> | <b>0.88*</b><br><b><math>\pm 0.11</math></b> | <b>0.903*</b><br><b><math>\pm 0.086</math></b> |
| Mean + AE + PCA                                 | 0.884*<br>$\pm 0.092$                          | 0.883*<br>$\pm 0.081$                          | 0.888*<br>$\pm 0.087$                          | 0.87*<br>$\pm 0.11$                            | 0.87*<br>$\pm 0.11$                          | 0.86<br>$\pm 0.12$                           | 0.889<br>$\pm 0.09$                            |
| TT-WOPT                                         | 0.686*<br>$\pm 0.089$                          | 0.60*<br>$\pm 0.11$                            | 0.605*<br>$\pm 0.096$                          | 0.545*<br>$\pm 0.064$                          | 0.694*<br>$\pm 0.076$                        | 0.621*<br>$\pm 0.075$                        | 0.643*<br>$\pm 0.098$                          |

**Supplementary Table S5. AUROCs of drug signature predictions by CrossTx using the Regression method as Predictor and TT-WOPT for individual cell lines.** Values correspond to mean  $\pm$  standard deviation. Bold values signify the best method based on Pearson correlation. Statistical significance was established by two-sided paired t-test to assessed the change in accuracy by adding a Corrector. For example, Mean + PCA was compared to Mean, while Mean + PCA + AE was compared to Mean + PCA. Note that the addition of a Corrector may degrade accuracy. TT-WOPT was compared to the Regression method. \*:  $p$ -values < 0.05.

| Cell type \ Method                              | MCF7                                         | A375                                         | HT29                                         | PC3                                          | HA1E                                         | YAPC                                         | HELA                                         |
|-------------------------------------------------|----------------------------------------------|----------------------------------------------|----------------------------------------------|----------------------------------------------|----------------------------------------------|----------------------------------------------|----------------------------------------------|
| <b>AUROC for predicting upregulated genes</b>   |                                              |                                              |                                              |                                              |                                              |                                              |                                              |
| Regression                                      | 0.765<br>$\pm 0.078$                         | 0.774<br>$\pm 0.07$                          | 0.767<br>$\pm 0.089$                         | 0.772<br>$\pm 0.079$                         | 0.764<br>$\pm 0.086$                         | 0.75<br>$\pm 0.11$                           | 0.764<br>$\pm 0.088$                         |
| Regression + PCA                                | 0.80*<br>$\pm 0.12$                          | 0.84*<br>$\pm 0.11$                          | 0.82*<br>$\pm 0.13$                          | 0.80*<br>$\pm 0.13$                          | 0.80*<br>$\pm 0.13$                          | 0.80*<br>$\pm 0.14$                          | 0.81*<br>$\pm 0.14$                          |
| Regression + AE                                 | 0.73*<br>$\pm 0.13$                          | 0.63*<br>$\pm 0.19$                          | 0.72*<br>$\pm 0.15$                          | 0.67*<br>$\pm 0.17$                          | 0.62*<br>$\pm 0.21$                          | 0.69*<br>$\pm 0.15$                          | 0.74*<br>$\pm 0.15$                          |
| Regression + PCA + AE                           | <b>0.82*</b><br><b><math>\pm 0.12</math></b> | <b>0.86*</b><br><b><math>\pm 0.11</math></b> | <b>0.83*</b><br><b><math>\pm 0.14</math></b> | <b>0.81*</b><br><b><math>\pm 0.13</math></b> | <b>0.8*</b><br><b><math>\pm 0.15</math></b>  | <b>0.82*</b><br><b><math>\pm 0.14</math></b> | <b>0.82*</b><br><b><math>\pm 0.14</math></b> |
| Regression + AE + PCA                           | 0.73<br>$\pm 0.14$                           | 0.64*<br>$\pm 0.23$                          | 0.76*<br>$\pm 0.16$                          | 0.69*<br>$\pm 0.18$                          | 0.62<br>$\pm 0.23$                           | 0.73*<br>$\pm 0.14$                          | 0.73<br>$\pm 0.16$                           |
| TT-WOPT                                         | 0.647<br>$\pm 0.08$                          | 0.592<br>$\pm 0.097$                         | 0.586<br>$\pm 0.09$                          | 0.522<br>$\pm 0.061$                         | 0.683<br>$\pm 0.08$                          | 0.572<br>$\pm 0.074$                         | 0.618<br>$\pm 0.099$                         |
| <b>AUROC for predicting downregulated genes</b> |                                              |                                              |                                              |                                              |                                              |                                              |                                              |
| Regression                                      | 0.786<br>$\pm 0.075$                         | 0.784<br>$\pm 0.068$                         | 0.788<br>$\pm 0.084$                         | 0.787<br>$\pm 0.081$                         | 0.773<br>$\pm 0.081$                         | 0.77<br>$\pm 0.1$                            | 0.781<br>$\pm 0.076$                         |
| Regression + PCA                                | 0.83*<br>$\pm 0.12$                          | 0.86*<br>$\pm 0.1$                           | 0.84*<br>$\pm 0.12$                          | 0.82*<br>$\pm 0.12$                          | 0.81*<br>$\pm 0.13$                          | 0.83*<br>$\pm 0.13$                          | 0.83*<br>$\pm 0.12$                          |
| Regression + AE                                 | 0.75*<br>$\pm 0.13$                          | 0.61*<br>$\pm 0.2$                           | 0.73*<br>$\pm 0.15$                          | 0.68*<br>$\pm 0.18$                          | 0.60*<br>$\pm 0.22$                          | 0.70*<br>$\pm 0.16$                          | 0.77*<br>$\pm 0.13$                          |
| Regression + PCA + AE                           | <b>0.85*</b><br><b><math>\pm 0.11</math></b> | <b>0.87*</b><br><b><math>\pm 0.11</math></b> | <b>0.85*</b><br><b><math>\pm 0.12</math></b> | <b>0.83*</b><br><b><math>\pm 0.13</math></b> | <b>0.82*</b><br><b><math>\pm 0.14</math></b> | <b>0.85*</b><br><b><math>\pm 0.12</math></b> | <b>0.85*</b><br><b><math>\pm 0.12</math></b> |
| Regression + AE + PCA                           | 0.75<br>$\pm 0.15$                           | 0.63*<br>$\pm 0.25$                          | 0.79*<br>$\pm 0.15$                          | 0.71*<br>$\pm 0.17$                          | 0.61<br>$\pm 0.24$                           | 0.74*<br>$\pm 0.15$                          | 0.77<br>$\pm 0.14$                           |
| TT-WOPT                                         | 0.686*<br>$\pm 0.089$                        | 0.60*<br>$\pm 0.11$                          | 0.605*<br>$\pm 0.096$                        | 0.545*<br>$\pm 0.064$                        | 0.694*<br>$\pm 0.076$                        | 0.621*<br>$\pm 0.075$                        | 0.643*<br>$\pm 0.098$                        |
